# Supplementary material for: Synthesis of the bisbenzannelated spiroketal core of the γ‐rubromycins. The use of a novel Nef‐type reaction mediated by Pearlman’s catalyst
Source: Royal Society of Chemistry journal article supplement (doi:10.1039/b002984j), 2000-01-01
Supplement: b002984j.doc [file b002984j.doc]

# Supplementary data

**Synthesis of the bisbenzannelated spiroketal core of the *-*rubromycins. The use of a novel Nef*-*type reaction mediated by Pearlman’s catalyst**

## **Tanya Capecchi, Charles B. de Koning* and Joseph P. Michael**

*Centre for Molecular Design, Department of Chemistry, University of the Witwatersrand, PO Wits 2050, South Africa*

**Experimental details and full characterization of compound 8 and 12–16**

**2,5-Dimethoxyphenol 12**1

2,5*-*Dimethoxybenzaldehyde **11** (6.034 g, 36.32 mmol) was dissolved in methanol (200 cm3), and cooled to 0 C. The magnesium salt of monoperoxyphthalic acid (MMPP) (85% pure; 26.87 g, 46.17 mmol) was added portionwise to the solution. The cooling bath was removed after 2 h, and the reaction mixture stirred under a nitrogen atmosphere at room temperature for a further 18 h. After this time, a thick white precipitate had formed. This was removed by filtration, and the precipitate washed with copious quantities of ethyl acetate. The combined organic solvents were removed *in vacuo*, and the resultant gum purified by column chromatography (15% ethyl acetate-hexane) to yield the *phenol* **12** as a clear oil (8.127 g, 94%). **max(film)/cm-1 3436 (s, OH), 3002 (m, Ar-H), 1598 (s, ArC*=*C), 1238 (s, C*-*O) and 790 (s, oop ArC*-*H); H (200 MHz; CDCl3; Me4Si) 6.73 (1H, d, *J* 8.8, H*-*3), 6.57 (1H, d, *J* 3.0, H*-*6), 6.35 (1H, dd, *J* 8.8 and 3.0, H*-*4), 6.11 (1H, br s, O*H*), 3.76 and 3.70 (each 3H, s, OC*H3*); C (50.32 MHz; CDCl3) 154.5 (C*-*1a), 146.4 (C*-*2a), 141.0 (C*-*5a), 111.5, 104.1 and 101.8 (3  Ar*-*C) and 56.5 and 55.5 (each O*C*H3).

**1,4-Dimethoxy-2-(methoxymethoxy)benzene 13**

Phenol **12** (2.401 g, 15.57 mmol) was dissolved in dry dichloromethane (150 cm3) and the solution was cooled to 0 C. Diisopropylethylamine (6.78 cm3, 5.03 g, 38.9 mmol) was added, followed by the dropwise addition of methoxymethyl chloride (1.77 cm3, 1.88 g, 23.4 mmol). After 1 h, the ice bath was removed and the reaction mixture was allowed to stir at room temperature for 15 h. Tlc analysis using Pauly’s salt2 as a spray reagent showed the reaction to be complete. Approximately 70% of the dichloromethane was removed *in vacuo*, and the remaining solution was diluted with diethyl ether (50 cm3). The organic layer was washed with 75 cm3 each of aqueous 10% HCl, H2O, aqueous 10% (w/v) NaOH and aqueous saturated NaCl solutions respectively. The organic layer was then dried (MgSO4), and the solvent removed *in vacuo*. The crude yellow oil was purified by column chromatography (10% ethyl acetate-hexane), yielding the *substituted benzene* **13** as a clear oil (2.729 g, 88%). (Found: M+, 198.0890. C10H14O4 requires *M*, 198.0892); **max(film)/cm-1 2996 (m, Ar-H), 1594 (m, ArC*=*C), 1226 (s, C*-*O) and 766 (m, oop ArC*-*H); H (200 MHz; CDCl3; Me4Si) 6.80 (1H, d, *J* 8.9, H*-*6), 6.79 (1H, d, *J* 3.0, H*-*3), 6.48 (1H, dd, *J* 8.9 and *J* 3.0, H*-*5), 5.20 (2H, s, OC*H2*OCH3), 3.84 and 3.73 (each 3H, s, OC*H3*) and 3.50 (3H, s, OCH2OC*H3*); C (50.32 MHz; CDCl3) 153.9 (C*-*2a), 147.0 (C*-*1a), 143.8 (C*-*4a), 112.3, 105.3 and 104.2 (3  Ar*-*C), 95.2 (O*C*H2OCH3), 56.2 (OCH2O*C*H3) and 55.9 and 55.3 (each O*C*H3); *m/z* (EI) 198 (M+, 46%), 180 (4), 168 (19), 153 (13) and 45 (100).

**1,4-Dimethoxy-2-methoxymethoxy-3-(prop-2-enyl)benzene 14**

1,4-Dimethoxy-2-methoxymethoxybenzene **13** (2.901 g, 14.63 mmol) was dissolved in dry tetrahydrofuran (250 cm3) and cooled to –25 C. TMEDA (4.42 cm3, 3.40 g, 29.3 mmol) was added, followed by *n*-butyllithium (18.29 cm3 of a 1.60 M solution in hexane, 29.3 mmol), causing the reaction to turn yellow. The reaction was stirred at –25 C for 1 hour, after which, allyl bromide (2.53 cm3, 3.54 g, 29.3 mmol) was added, whereupon the reaction went orange. After 1 h, the reaction was allowed to warm to room temperature, and stirred for 18 h. The reaction had changed again, to a pale yellow, cloudy solution. Water (50 cm3) was added, and the mixture extracted with diethyl ether (2 x 50 cm3). The ethereal extracts were dried (MgSO4) and the solvent removed *in vacuo*. The residue was subjected to column chromatography (10% ethyl acetate*-*hexane) to yield the *product* **14** as a yellow oil (3.138 g, 97% based on starting material converted, 93% conversion); as well as recovered starting material **13** (0.213 g). (Found: M+, 238.1215. C13H18O4 requires *M*, 238.1205); ****max(film)/cm-1 2938 (m, =CH2), 2834 (m, Ar-H), 1592 (w, ArC=C), 1256 (s, C*-*O) and 792 (m, oop ArC*-*H); H (200 MHz; CDCl3; Me4Si) 6.73 (1H, d, *J* 8.7, H*-*6), 6.56 (1H, d, *J* 8.7, H*-*5), 6.00-5.92 (1H, m, CH2C*H*CH2), 5.09 (2H, s, OC*H2*OCH3), 5.09-4.92 (2H, m, CH2CHC*H2*), 3.78 and 3.76 (each 3H, s, OC*H3*), 3.58 (3H, s, OCH2OC*H3*) and 3.48 (2H, dt, *J* 6.1 and 1.6, C*H2*CHCH2); C (50.32 MHz; CDCl3) 152.3 (C*-*2a), 146.6 (C*-*1a), 144.9 (C*-*4a), 136.8 (C*-*3'), 123.2 (C*-*3), 114.4 (C*-*2'), 110.2 (Ar*-*C), 105.9 (Ar*-*C), 98.9 (O*C*H2OCH3), 57.4 (OCH2O*C*H3), 56.1 and 55.9 (each O*C*H3) and 28.3 (C*-*1'); *m/z* (EI) 238 (M+, 39%), 193 (23), 191 (20), 178 (6), 163 (7), 161 (16), 149 (27), 133 (7), 121 (3), 105 (4), 91 (7), 77 (8), 71 (3), 65 (6), 57 (9) and 45 (100).

**(3,6-Dimethoxy-2-methoxymethoxyphenyl)acetaldehyde 15**

1,4-Dimethoxy-2-methoxymethoxy-3-(prop-2-enyl)benzene **14** (0.206 g, 0.863 mmol) was dissolved in methanol (15 cm3), and the solution cooled to –40 C. Ozone was bubbled through the solution until an indicator solution of potassium iodide in water turned yellow. The reaction mixture was then removed from the cooling bath, and dimethyl sulfide (0.123 cm3, 0.104 g, 1.68 mmol) was added and the mixture left to stir for 1 h at room temperature. The solvent was removed *in vacuo*, to yield a crude yellow oil. This was purified by column chromatography (20% ethyl acetate*-*hexane) to yield aromatic *acetaldehyde* **15** (0.184 g, 89%) as a yellow oil; (Found: M+, 240.1007. C12H16O5 requires *M*, 240.0998); ****max(film)/cm-1 2942 (m, Ar-H), 2723 (w, C*-*H of aldehyde), 1724 (s, C=O), 1593 (w, ArC=C), 1259 (s, C*-*O) and 796 (m, oop ArC*-*H); H (200 MHz; CDCl3; Me4Si) 9.62 (1H, t, *J* 1.9, H*-*1), 6.84 (1H, d, *J* 9.0, H*-*4'), 6.62 (1H, d, *J* 9.0, H*-*5'), 5.09 (2H, s, OC*H2*OCH3), 3.81 and 3.76 (each 3H, s, OC*H3*), 3.76 (2H, s, H*-*2), 3.52 (3H, s, OCH2OC*H3*); C (50.32 MHz; CDCl3) 200.4 (C*-*1), 152.2 (C*-*2'a), 146.4 (C*-*3'a), 145.6 (C*-*6'a), 116.6 (C*-*1'), 111.5 and 105.6 (2  Ar*-*C), 99.0 (O*C*H2OCH3), 57.4 (OCH2O*C*H3), 56.2 and 55.8 (each OCH3) and 39.1 (C*-*2); *m/z* (EI) 240 (M+, 21%), 208 (15), 195 (3), 179 (16), 178 (11), 163 (16), 149 (9), 137 (6), 123 (5), 107 (3), 95 (3), 89 (1), 77 (4), 65 (4), 51 (4) and 45 (100).

**2-(3,6-Dimethoxy-2-methoxymethoxyphenyl)ethanal propylene dithioacetal 8**

(3,6-Dimethoxy-2-methoxymethoxyphenyl)acetaldehyde **15** (0.184 g, 0.768 mmol) was dissolved in benzene (30 cm3). *p*-Toluenesulfonic acid (0.007 g, 0.04 mmol) and 1,3-propanedithiol (0.081 cm3, 0.087 g, 0.81 mmol) were then added, and the reaction heated under reflux, using a Dean-Stark apparatus for 18 h. The reaction mixture was then allowed to cool, and the solvent removed *in vacuo* to yield a brown oil. This was subjected to column chromatography (5% ethyl acetate-hexane to remove the excess 1,3-propanedithiol, after which the thioacetal was eluted using 20% ethyl acetate-hexane), to afford the intermediate 2-(2-hydroxy-3,6-dimethoxyphenyl)ethanal propylene dithioacetal(0.218 g, 99%) as a clear oil. (Found: M+, 286.0699. C13H18S2O3 requires *M*, 286.0692); ****max(film)/cm-1 3444 (s, OH), 2936 (s, Ar-H), 2833 (s, C*-*O), 1600 (m, ArC=C), 1439 (s, S*-*CH2), 1247 (s, C*-*O) and 786 (m, oop ArC*-*H); H (200 MHz; CDCl3; Me4Si) 6.69 (1H, d, *J* 8.9, H*-*4'), 6.33 (1H, d, *J* 8.9, H*-*5'), 5.88 (1H, br s, O*H*), 4.40 (1H, t, *J* 7.8, H*-*1), 3.82 and 3.76 (each 3H, s, OC*H3*), 3.19 (2H, d, *J* 7.8, H*-*2), 2.87-2.73 (4H, m, H*-*7 and H*-*9) and 2.10-1.76 (2H, m, H*-*8); C (50.32 MHz; CDCl3) 152.8 (C*-*2'a), 144.7 (C*-*3'a), 140.7 (C*-*6'a), 112.8 (C*-*1'), 108.7 and 100.6 (2  Ar*-*C), 56.1 and 55.6 (each O*C*H3), 46.0 (C*-*1), 30.8 (C*-*7 and C*-*9), 29.6 (C*-*2) and 25.9 (C*-*8); *m/z* (EI) 286 (M+, 20%), 179 (4), 164 (3), 149 (3), 121 (10), 119 (100), 75 (2) and 45 (4).

The intermediate (0.218 g, 0.760 mmol) was dissolved in dry dichloromethane (15 cm3) and cooled to 0 C. Diisopropylethylamine (0.331 cm3, 0.245 g, 1.90 mmol) was added, followed by methoxymethyl chloride (0.087 cm3, 0.092 g, 1.14 mmol). After 30 min, the cooling bath was removed and the reaction stirred at room temperature overnight under a nitrogen atmosphere. Tlc analysis using Pauly’s salt as spray reagent showed that the reaction was incomplete. Two further additions of the abovementioned quantities of both the amine and the chloride were added, and the reaction left stirring for a further 96 h. The solvent was removed *in vacuo* and the residue taken up in diethyl ether (30 cm3). The ethereal layer washed washed successively with 50 cm3 each of 1 M aqueous HCl, H2O and 10% aqueous NaOH. The ethereal layer was dried (MgSO4), and the solvent removed *in vacuo*. The crude oil obtained was purified by column chromatography (20% ethyl acetate*-*hexane) to yield the *dithioacetal* **8** (0.161 g, 64%) as a clear oil. (Found: M+, 330.0971. C15H22S2O4 requires *M*, 330.0960); ****max(film)/cm-1 2934 (s, Ar-H), 1592 (m, ArC=C), 1436 (s, S*-*CH2), 1199 (s, C*-*O) and 753 (m, oop ArC*-*H); H (200 MHz; CDCl3; Me4Si) 6.77 (1H, d, *J* 9.0, H*-*4'), 6.57 (1H, d, *J* 9.0, H*-*5'), 5.14 (2H, s, OC*H2*OCH3), 4.41 (1H, t, *J* 7.9, H*-*1), 3.78 and 3.77 (each 3H, s, OC*H3*), 3.61 (3H, s, OCH2OC*H3*), 3.22 (2H, d, *J* 7.9, H*-*2), 2.84-2.76 (4H, m, H*-*7 and H*-*9) and 2.18-1.71 (2H, m, H*-*8); C (50.32 MHz; CDCl3) 152.3 (C*-*2'a), 146.1 (C*-*3'a), 145.5 (C*-*6'a), 121.0 (C*-*1'), 110.7 (Ar*-*C), 105.4 (Ar*-*C), 98.9 (O*C*H2OCH3), 57.5 (OCH2O*C*H3), 55.9 and 55.7 (each OCH3), 46.7 (C*-*1), 29.8 (C*-*7 and C*-*9), 29.7 (C*-*2) and 25.9 (C*-*8); *m/z* (EI) 330 (M+, 57%), 285 (36), 179 (36), 178 (14), 151 (10), 121 (14), 119 (100) and 45 (30).

**1-Methoxy-2-(prop-2-enyloxy)benzene 16**3

Guaiacol (10.387 g, 83.67 mmol) was dissolved in distilled acetone (500 cm3). Allyl bromide (18.10 cm3, 25.31 g, 0.21 mol) was added, followed by potassium carbonate (29.55 g, 0.21 mol). The reaction mixture was heated under reflux for 12 h under an inert atmosphere of nitrogen. On completion, the reaction mixture was cooled, and the inorganic solids removed by filtration. The solvent was removed *in vacuo*, leaving a yellow oil, which was taken up into diethyl ether (100 cm3), and washed with H2O (3  50 cm3). The organic layer was then dried (MgSO4), and the solvent removed *in vacuo*, yielding a yellow oil. Column chromatography (5% ethyl acetate-hexane) yielded the *product* **16** as a clear oil (13.595 g, 99%) (lit.3). **max(film)/cm-1 2938 (w, =CH2), 1592 (s, ArC*=*C), 1502 (w, ArC*=*C), 1252 and 1224 (vs, C*-*O) and 744 (s, oop ArC*-*H); H (200 MHz; CDCl3; Me4Si) 6.97*-*6.84 (4H, m, Ar*-*H), 6.18*-*5.99 (1H, m, OCH2C*H*=CH2), 5.45*-*5.23 (2H, m, OCH2CH=C*H2*), 4.60 (2H, dt, *J* 5.4 and 1.5, OC*H2*CH=CH2) and 3.85 (3H, s, OC*H3*); C (50.32 MHz; CDCl3) 149.3 (C*-*2a), 147.8 (C*-*1a), 133.3 (OCH2*C*H=CH2), 121.1 and 120.6 (2  Ar*-*C), 117.7 (OCH2CH=*C*H2), 113.3 and 111.5 (2  Ar*-*C), 69.6 (O*C*H2CH=CH2) and 55.7 (O*C*H3).

# References

1. Burger and G. T. Fitchett, *J. Am. Chem. Soc.*, 1953, **75**, 1359.
2. *Dyeing Reagents for Thin Layer and Paper Chromatography*, E. Merck, Darmstadt, Germany, 1971, p. 14.
3. C. F. H. Allen and J. W. Gates Jr., In *Org. Synth. Coll. Vol.* *III,* ed. E.C. Horning, John Wiley & Sons, Inc., London, 1955, pp. 418-420.
